# Supplementary material for: Investigation of Nasal/Oropharyngeal Microbial Community of COVID-19 Patients by 16S rDNA Sequencing
Source: PubMed Central journal article supplement (PMC7926517; doi:10.3390/ijerph18042174), 2021-02-23
Supplement: ijerph-18-02174-s001.pdf [file ijerph-18-02174-s001.pdf]

**Supplementary Table 1.** Comparisons of bacteria median abundance at phylum (A), Family (B) and Genus (C) among patients groups (only significant results were shown)

**A. Phylum**

| Bacteria                       | CTRLs neg<br>(N=10)         | Other HCoVs<br>(N=8)        | SARS-CoV2<br>pauci-<br>symptomatic<br>(N=11) | SARS-CoV2<br>ICU (N=10)     | p-value<br>overall* | Group comparisons (p-values)# |                      |                    |                             |                           |                     |
|--------------------------------|-----------------------------|-----------------------------|----------------------------------------------|-----------------------------|---------------------|-------------------------------|----------------------|--------------------|-----------------------------|---------------------------|---------------------|
|                                |                             |                             |                                              |                             |                     | Other<br>HCoVs<br>vs. CTRL    | Pauci<br>vs.<br>CTRL | ICU<br>vs.<br>CTRL | Pauci vs.<br>Other<br>HCoVs | ICU vs.<br>Other<br>HCoVs | ICU<br>vs.<br>Pauci |
| Candidatus<br>Saccharibacteria | 1.1674<br>[0.3976 - 2.3924] | 0.0125<br>[0.0065 - 0.3667] | 1.9562<br>[0.6829 - 3.9751]                  | 0.0093<br>[0.0026 - 0.1047] | 0.027               | 0.062                         | 0.673                | 0.021              | 0.078                       | 1.000                     | 0.031               |
| Deinococcus Thermus            | 0.0071<br>[0.0032 - 0.0161] | Absent                      | Absent                                       | Absent                      | <0.001              | 0.001                         | <0.001               | <0.001             | 1.000                       | 1.000                     | 1.000               |

Median relative abundance (%) along with interquartile range [first-third quartiles]; Absent: all values are 0%

\*p-values from Kruskal-Wallis test and were adjusted following the Bonferroni correction for multiple testing

#p-values from Dwass-Steel-Critchlow-Fligner test

## B. Family

| Bacteria            | CTRLs neg<br>(N=10)         | Other HCoVs<br>(N=8)        | SARS-CoV2<br>pauci-<br>symptomatic<br>(N=11) | SARS-CoV2<br>ICU (N=10) | p-value<br>overall* | Group comparisons (p-values)# |                      |                    |                             |                           |                     |
|---------------------|-----------------------------|-----------------------------|----------------------------------------------|-------------------------|---------------------|-------------------------------|----------------------|--------------------|-----------------------------|---------------------------|---------------------|
|                     |                             |                             |                                              |                         |                     | Other<br>HCoVs<br>vs. CTRL    | Pauci<br>vs.<br>CTRL | ICU<br>vs.<br>CTRL | Pauci vs.<br>Other<br>HCoVs | ICU vs.<br>Other<br>HCoVs | ICU<br>vs.<br>Pauci |
| Acetobacteraceae    | Absent                      | 0.0010<br>[0.0005 - 0.0180] | Absent                                       | Absent                  | <0.001              | <0.001                        | 1.000                | 1.000              | <0.001                      | <0.001                    | 1.000               |
| Aeromonadaceae      | 0.0256<br>[0.0203 - 0.0392] | 0.0102<br>[0.0051 - 0.0374] | 0.0325<br>[0.0138 - 0.0601]                  | Absent                  | 0.004               | 0.542                         | 1.000                | <0.001             | 0.550                       | <0.001                    | <0.001              |
| Alcaligenaceae      | Absent                      | 0.0074<br>[0.0009 - 0.0215] | Absent                                       | Absent                  | <0.001              | <0.001                        | 1.000                | 1.000              | <0.001                      | <0.001                    | 1.000               |
| Alicyclobacillaceae | 0.0089<br>[0.0016 - 0.0344] | Absent                      | Absent                                       | Absent                  | <0.001              | 0.001                         | <0.001               | <0.001             | 1.000                       | 1.000                     | 1.000               |
| Brevibacteriaceae   | Absent                      | 0.0257<br>[0.0009 - 0.1044] | Absent                                       | Absent                  | <0.001              | <0.001                        | 1.000                | 1.000              | <0.001                      | <0.001                    | 1.000               |
| Caulobacteraceae    | 0.0060<br>[0.0033 - 0.0077] | 0.0237<br>[0.0048 - 0.0714] | Absent                                       | Absent                  | <0.001              | 0.599                         | <0.001               | <0.001             | <0.001                      | <0.001                    | 1.000               |
| Cellvibrionaceae    | Absent                      | 0.0004<br>[0.0001 - 0.0035] | Absent                                       | Absent                  | <0.001              | 0.008                         | 1.000                | 1.000              | 0.005                       | 0.008                     | 1.000               |
| Chitinophagaceae    | Absent                      | 0.0145<br>[0.0010 - 0.0271] | Absent                                       | Absent                  | <0.001              | <0.001                        | 1.000                | 1.000              | <0.001                      | <0.001                    | 1.000               |
| Christensenellaceae | Absent                      | 0.0003<br>[0.0000 - 0.0009] | Absent                                       | Absent                  | 0.011               | 0.025                         | 1.000                | 1.000              | 0.018                       | 0.025                     | 1.000               |
| Chromobacteriaceae  | 0.0089<br>[0.0042 - 0.0366] | Absent                      | Absent                                       | Absent                  | <0.001              | 0.001                         | <0.001               | <0.001             | 1.000                       | 1.000                     | 1.000               |
| Coriobacteriaceae   | Absent                      | 0.0010<br>[0.0003 - 0.0176] | Absent                                       | Absent                  | <0.001              | 0.002                         | 1.000                | 1.000              | 0.001                       | 0.002                     | 1.000               |
| Deinococcaceae      | 0.0053<br>[0.0020 - 0.0108] | Absent                      | Absent                                       | Absent                  | <0.001              | 0.001                         | <0.001               | <0.001             | 1.000                       | 1.000                     | 1.000               |

|                     |                             |                             |                             |                             |        |        |        |        |        |        |        |
|---------------------|-----------------------------|-----------------------------|-----------------------------|-----------------------------|--------|--------|--------|--------|--------|--------|--------|
| Demequinaceae       | Absent                      | 0.0039<br>[0.0008 - 0.0127] | Absent                      | Absent                      | <0.001 | <0.001 | 1.000  | 1.000  | <0.001 | <0.001 | 1.000  |
| Dermabacteraceae    | Absent                      | 0.0019<br>[0.0014 - 0.0558] | Absent                      | 0.0004<br>[0.0000 - 0.0014] | <0.001 | <0.001 | 1.000  | 0.027  | <0.001 | 0.239  | 0.019  |
| Desulfovibrionaceae | Absent                      | 0.0001<br>[0.0000 - 0.0004] | Absent                      | Absent                      | 0.011  | 0.025  | 1.000  | 1.000  | 0.018  | 0.025  | 1.000  |
| Erwiniaceae         | Absent                      | 0.0121<br>[0.0087 - 0.0194] | Absent                      | 0.0032<br>[0.0010 - 0.0225] | <0.001 | <0.001 | 1.000  | 0.001  | <0.001 | 0.542  | <0.001 |
| Geodermatophilaceae | Absent                      | 0.0064<br>[0.0004 - 0.0315] | Absent                      | Absent                      | <0.001 | 0.002  | 1.000  | 1.000  | 0.001  | 0.002  | 1.000  |
| Halanaerobiaceae    | Absent                      | Absent                      | 0.0103<br>[0.0054 - 0.0173] | Absent                      | <0.001 | 1.000  | <0.001 | 1.000  | <0.001 | 1.000  | <0.001 |
| Helicobacteraceae   | 0.0098<br>[0.0059 - 0.0128] | Absent                      | 0.0063<br>[0.0048 - 0.0169] | Absent                      | <0.001 | 0.001  | 0.999  | <0.001 | <0.001 | 1.000  | <0.001 |
| Hydrogenophilaceae  | 0.0388<br>[0.0088 - 0.1464] | Absent                      | Absent                      | Absent                      | <0.001 | 0.001  | <0.001 | <0.001 | 1.000  | 1.000  | 1.000  |
| Intrasporangiaceae  | 0.0078<br>[0.0043 - 0.0215] | 0.0062<br>[0.0015 - 0.0227] | Absent                      | Absent                      | <0.001 | 0.985  | <0.001 | <0.001 | <0.001 | <0.001 | 1.000  |
| Methylobacteriaceae | Absent                      | 0.0845<br>[0.0049 - 0.1511] | 0.0007<br>[0.0004 - 0.0012] | Absent                      | <0.001 | 0.002  | 0.003  | 1.000  | 0.114  | 0.002  | 0.003  |
| Microbacteriaceae   | 0.0107<br>[0.0092 - 0.0203] | 0.0792<br>[0.0153 - 0.1389] | Absent                      | 0.0083<br>[0.0070 - 0.0137] | 0.001  | 0.379  | <0.001 | 0.715  | <0.001 | 0.143  | <0.001 |
| Morganellaceae      | Absent                      | 0.0152<br>[0.0060 - 0.0494] | Absent                      | Absent                      | <0.001 | <0.001 | 1.000  | 1.000  | <0.001 | <0.001 | 1.000  |
| Mycobacteriaceae    | Absent                      | 0.0077<br>[0.0034 - 0.0274] | Absent                      | Absent                      | <0.001 | <0.001 | 1.000  | 1.000  | <0.001 | <0.001 | 1.000  |
| Nocardiaceae        | Absent                      | 0.0264<br>[0.0106 - 0.0693] | Absent                      | 0.0095<br>[0.0056 - 0.0176] | <0.001 | <0.001 | 1.000  | 0.001  | <0.001 | 0.285  | <0.001 |
| Nocardiodaceae      | Absent                      | 0.0120<br>[0.0028 - 0.0526] | Absent                      | Absent                      | <0.001 | 0.002  | 1.000  | 1.000  | 0.001  | 0.002  | 1.000  |
| Odoribacteraceae    | Absent                      | 0.0029                      | Absent                      | Absent                      | 0.011  | 0.025  | 1.000  | 1.000  | 0.018  | 0.025  | 1.000  |

|                                                     |                             |                             |                             |                             |        |        |        |        |        |        |        |
|-----------------------------------------------------|-----------------------------|-----------------------------|-----------------------------|-----------------------------|--------|--------|--------|--------|--------|--------|--------|
|                                                     |                             | [0.0000 - 0.0086]           |                             |                             |        |        |        |        |        |        |        |
| Oxalobacteraceae                                    | 0.0115<br>[0.0042 - 0.0145] | 0.0067<br>[0.0051 - 0.0447] | Absent                      | Absent                      | <0.001 | 0.996  | <0.001 | <0.001 | <0.001 | <0.001 | 1.000  |
| Pectobacteriaceae                                   | Absent                      | Absent                      | Absent                      | 0.0009<br>[0.0002 - 0.0127] | <0.001 | 1.000  | 1.000  | 0.004  | 1.000  | 0.010  | 0.002  |
| Planococcaceae                                      | Absent                      | 0.0061<br>[0.0024 - 0.0199] | Absent                      | Absent                      | <0.001 | <0.001 | 1.000  | 1.000  | <0.001 | <0.001 | 1.000  |
| Pseudonocardiaceae                                  | Absent                      | 0.0083<br>[0.0023 - 0.0279] | Absent                      | Absent                      | <0.001 | <0.001 | 1.000  | 1.000  | <0.001 | <0.001 | 1.000  |
| Rhizobiaceae                                        | Absent                      | 0.0054<br>[0.0018 - 0.0242] | Absent                      | Absent                      | <0.001 | <0.001 | 1.000  | 1.000  | <0.001 | <0.001 | 1.000  |
| Rikenellaceae                                       | Absent                      | 0.0004<br>[0.0001 - 0.0108] | Absent                      | Absent                      | <0.001 | 0.008  | 1.000  | 1.000  | 0.005  | 0.008  | 1.000  |
| Rubrobacteraceae                                    | 0.0029<br>[0.0009 - 0.0118] | 0.0186<br>[0.0003 - 0.0307] | Absent                      | Absent                      | <0.001 | 0.998  | <0.001 | <0.001 | 0.001  | 0.002  | 1.000  |
| Ruminococcaceae                                     | Absent                      | 0.0078<br>[0.0018 - 0.0570] | Absent                      | Absent                      | <0.001 | <0.001 | 1.000  | 1.000  | <0.001 | <0.001 | 1.000  |
| Sphingobacteriaceae                                 | Absent                      | 0.0110<br>[0.0024 - 0.0527] | Absent                      | Absent                      | <0.001 | <0.001 | 1.000  | 1.000  | <0.001 | <0.001 | 1.000  |
| Sphingomonadaceae                                   | Absent                      | 0.1584<br>[0.0066 - 0.2531] | Absent                      | Absent                      | <0.001 | <0.001 | 1.000  | 1.000  | <0.001 | <0.001 | 1.000  |
| Sporomusaceae                                       | 0.0242<br>[0.0087 - 0.1157] | Absent                      | Absent                      | Absent                      | <0.001 | 0.001  | <0.001 | <0.001 | 1.000  | 1.000  | 1.000  |
| Thermoanaerobacteraceae                             | 0.0142<br>[0.0035 - 0.0848] | Absent                      | Absent                      | Absent                      | <0.001 | 0.001  | <0.001 | <0.001 | 1.000  | 1.000  | 1.000  |
| Thermoanaerobacterales<br>Family III Incertae Sedis | 0.0167<br>[0.0047 - 0.0542] | Absent                      | Absent                      | Absent                      | <0.001 | 0.001  | <0.001 | <0.001 | 1.000  | 1.000  | 1.000  |
| unknown<br>Actinomycetales                          | Absent                      | 0.0003<br>[0.0001 - 0.0115] | Absent                      | Absent                      | <0.001 | 0.008  | 1.000  | 1.000  | 0.005  | 0.008  | 1.000  |
| unknown<br>Alphaproteobacteria                      | Absent                      | 0.0120<br>[0.0081 - 0.0300] | 0.0090<br>[0.0059 - 0.0109] | Absent                      | <0.001 | <0.001 | <0.001 | 1.000  | 0.755  | <0.001 | <0.001 |

|                                  |                             |                             |                             |                             |        |        |        |        |        |        |        |
|----------------------------------|-----------------------------|-----------------------------|-----------------------------|-----------------------------|--------|--------|--------|--------|--------|--------|--------|
| unknown<br>Burkholderiales       | 0.0140<br>[0.0068 - 0.0145] | 0.0263<br>[0.0055 - 0.0374] | Absent                      | Absent                      | <0.001 | 0.925  | <0.001 | <0.001 | <0.001 | <0.001 | 1.000  |
| unknown<br>Campylobacteriales    | Absent                      | Absent                      | 0.0138<br>[0.0093 - 0.0237] | 0.0060<br>[0.0020 - 0.0103] | <0.001 | 1.000  | <0.001 | <0.001 | <0.001 | 0.001  | 0.259  |
| unknown<br>Epsilonproteobacteria | Absent                      | Absent                      | 0.0071<br>[0.0044 - 0.0185] | Absent                      | <0.001 | 1.000  | <0.001 | 1.000  | <0.001 | 1.000  | <0.001 |
| unknown<br>Erysipelotrichales    | Absent                      | 0.0005<br>[0.0002 - 0.0071] | Absent                      | Absent                      | <0.001 | 0.008  | 1.000  | 1.000  | 0.005  | 0.008  | 1.000  |
| unknown<br>Erysipelotrichia      | Absent                      | 0.0011<br>[0.0000 - 0.0041] | Absent                      | Absent                      | 0.011  | 0.025  | 1.000  | 1.000  | 0.018  | 0.025  | 1.000  |
| unknown<br>Flavobacteriales      | Absent                      | Absent                      | 0.0091<br>[0.0040 - 0.0130] | Absent                      | <0.001 | 1.000  | <0.001 | 1.000  | 0.003  | 1.000  | <0.001 |
| unknown<br>Fusobacteriales       | 0.0134<br>[0.0070 - 0.0267] | 0.0002<br>[0.0000 - 0.0062] | 0.0149<br>[0.0104 - 0.0278] | Absent                      | 0.016  | 0.115  | 0.992  | <0.001 | 0.298  | 0.070  | <0.001 |
| unknown Mollicutes               | 0.0080<br>[0.0016 - 0.0397] | Absent                      | 0.0119<br>[0.0059 - 0.0742] | Absent                      | <0.001 | 0.001  | 0.494  | <0.001 | <0.001 | 1.000  | <0.001 |
| unknown Neisseriales             | 0.0129<br>[0.0044 - 0.0708] | 0.0048<br>[0.0006 - 0.0158] | 0.0031<br>[0.0005 - 0.0117] | Absent                      | 0.009  | 0.542  | 0.259  | <0.001 | 1.000  | 0.002  | <0.001 |
| unknown Tenericutes              | Absent                      | Absent                      | 0.0070<br>[0.0047 - 0.0233] | Absent                      | <0.001 | 1.000  | <0.001 | 1.000  | <0.001 | 1.000  | <0.001 |
| unknown Tissierellia             | 0.0136<br>[0.0035 - 0.0296] | 0.0076<br>[0.0026 - 0.0241] | 0.0066<br>[0.0043 - 0.0339] | Absent                      | 0.007  | 0.939  | 1.000  | <0.001 | 0.988  | <0.001 | <0.001 |
| Xanthomonadaceae                 | Absent                      | 0.0272<br>[0.0028 - 0.0511] | Absent                      | 0.0053<br>[0.0029 - 0.0133] | <0.001 | <0.001 | 1.000  | <0.001 | <0.001 | 0.855  | <0.001 |
| Yersiniaceae                     | Absent                      | 0.0078<br>[0.0048 - 0.0155] | Absent                      | 0.0018<br>[0.0013 - 0.0155] | <0.001 | <0.001 | 1.000  | <0.001 | <0.001 | 0.951  | <0.001 |

Median relative abundance (%) along with interquartile range [first-third quartiles]; Absent: all values are 0%

\*p-values from Kruskal-Wallis test and were adjusted following the Bonferroni correction for multiple testing

#p-values from Dwass-Steel-Critchlow-Fligner test

## C. Genus

| Bacteria        | CTRLs neg<br>(N=10)         | Other HCoVs<br>(N=8)        | SARS-CoV2<br>pauci-<br>symptomatic<br>(N=11) | SARS-CoV2<br>ICU (N=10) | p-value<br>overall* | Group comparisons (p-values)# |                      |                    |                             |                           |                     |
|-----------------|-----------------------------|-----------------------------|----------------------------------------------|-------------------------|---------------------|-------------------------------|----------------------|--------------------|-----------------------------|---------------------------|---------------------|
|                 |                             |                             |                                              |                         |                     | Other<br>HCoVs<br>vs. CTRL    | Pauci<br>vs.<br>CTRL | ICU<br>vs.<br>CTRL | Pauci vs.<br>Other<br>HCoVs | ICU vs.<br>Other<br>HCoVs | ICU<br>vs.<br>Pauci |
| Acinetobacter   | 0.0142<br>[0.0051 - 0.0259] | 0.0494<br>[0.0065 - 0.1936] | 0.0028<br>[0.0011 - 0.0264]                  | Absent                  | 0.013               | 0.811                         | 0.833                | <0.001             | 0.350                       | <0.001                    | <0.001              |
| Aeromonas       | 0.0257<br>[0.0201 - 0.0391] | 0.0093<br>[0.0038 - 0.0371] | 0.0320<br>[0.0137 - 0.0593]                  | Absent                  | 0.008               | 0.542                         | 1.000                | <0.001             | 0.497                       | <0.001                    | <0.001              |
| Alistipes       | Absent                      | 0.0002<br>[0.0001 - 0.0080] | Absent                                       | Absent                  | 0.002               | 0.008                         | 1.000                | 1.000              | 0.005                       | 0.008                     | 1.000               |
| Anaerostipes    | Absent                      | 0.0030<br>[0.0007 - 0.0126] | Absent                                       | Absent                  | 0.002               | 0.008                         | 1.000                | 1.000              | 0.005                       | 0.008                     | 1.000               |
| Arsenophonus    | Absent                      | 0.0055<br>[0.0021 - 0.0188] | Absent                                       | Absent                  | <0.001              | 0.002                         | 1.000                | 1.000              | 0.001                       | 0.002                     | 1.000               |
| Arthrobacter    | 0.0124<br>[0.0045 - 0.0180] | 0.0373<br>[0.0150 - 0.0548] | Absent                                       | Absent                  | <0.001              | 0.243                         | <0.001               | <0.001             | <0.001                      | <0.001                    | 1.000               |
| Bergeyella      | 0.0799<br>[0.0311 - 0.0950] | 0.0002<br>[0.0000 - 0.0137] | 0.0477<br>[0.0242 - 0.0896]                  | Absent                  | 0.004               | 0.013                         | 0.866                | <0.001             | 0.045                       | 0.025                     | <0.001              |
| Bifidobacterium | 0.0079<br>[0.0009 - 0.0413] | 0.0084<br>[0.0017 - 0.0236] | 0.0014<br>[0.0003 - 0.0061]                  | Absent                  | 0.033               | 0.998                         | 0.538                | <0.001             | 0.496                       | <0.001                    | 0.007               |
| Blastococcus    | Absent                      | 0.0033<br>[0.0001 - 0.0130] | Absent                                       | Absent                  | 0.002               | 0.008                         | 1.000                | 1.000              | 0.005                       | 0.008                     | 1.000               |
| Blautia         | Absent                      | 0.0002<br>[0.0001 - 0.0153] | Absent                                       | Absent                  | 0.002               | 0.008                         | 1.000                | 1.000              | 0.005                       | 0.008                     | 1.000               |
| Brevibacterium  | Absent                      | 0.0256<br>[0.0009 - 0.1055] | Absent                                       | Absent                  | <0.001              | <0.001                        | 1.000                | 1.000              | <0.001                      | <0.001                    | 1.000               |
| Brevundimonas   | Absent                      | 0.0105<br>[0.0024 - 0.0375] | Absent                                       | Absent                  | <0.001              | <0.001                        | 1.000                | 1.000              | <0.001                      | <0.001                    | 1.000               |

|                  |                             |                             |                             |                             |        |        |        |        |        |        |        |
|------------------|-----------------------------|-----------------------------|-----------------------------|-----------------------------|--------|--------|--------|--------|--------|--------|--------|
| Bulleidia        | Absent                      | Absent                      | 0.0023<br>[0.0004 - 0.0156] | Absent                      | 0.005  | 1.000  | 0.007  | 1.000  | 0.017  | 1.000  | 0.007  |
| Burkholderia     | 0.0255<br>[0.0101 - 0.1044] | 0.0024<br>[0.0017 - 0.0031] | Absent                      | Absent                      | <0.001 | 0.023  | <0.001 | <0.001 | <0.001 | <0.001 | 1.000  |
| Butyrivibrio     | 0.0085<br>[0.0039 - 0.0469] | Absent                      | 0.0108<br>[0.0030 - 0.0159] | Absent                      | <0.001 | 0.001  | 0.961  | <0.001 | 0.003  | 1.000  | <0.001 |
| Casaltella       | Absent                      | 0.0007<br>[0.0001 - 0.0339] | Absent                      | Absent                      | 0.002  | 0.008  | 1.000  | 1.000  | 0.005  | 0.008  | 1.000  |
| Caulobacter      | Absent                      | 0.0055<br>[0.0002 - 0.0230] | Absent                      | Absent                      | <0.001 | 0.002  | 1.000  | 1.000  | 0.001  | 0.002  | 1.000  |
| Chryseobacterium | Absent                      | 0.0085<br>[0.0040 - 0.0139] | Absent                      | Absent                      | <0.001 | 0.002  | 1.000  | 1.000  | 0.001  | 0.002  | 1.000  |
| Clostridium      | 0.0477<br>[0.0140 - 0.0743] | 0.0417<br>[0.0098 - 0.1045] | 0.0221<br>[0.0146 - 0.0486] | Absent                      | 0.014  | 1.000  | 0.943  | <0.001 | 0.976  | <0.001 | <0.001 |
| Cupriavidus      | Absent                      | 0.0025<br>[0.0003 - 0.0154] | Absent                      | Absent                      | 0.002  | 0.008  | 1.000  | 1.000  | 0.005  | 0.008  | 1.000  |
| Deinococcus      | 0.0046<br>[0.0013 - 0.0109] | Absent                      | Absent                      | Absent                      | <0.001 | 0.001  | <0.001 | <0.001 | 1.000  | 1.000  | 1.000  |
| Dorea            | Absent                      | 0.0004<br>[0.0000 - 0.0055] | Absent                      | Absent                      | 0.021  | 0.025  | 1.000  | 1.000  | 0.018  | 0.025  | 1.000  |
| Enterobacter     | Absent                      | 0.0160<br>[0.0109 - 0.0548] | Absent                      | 0.0023<br>[0.0014 - 0.0539] | <0.001 | <0.001 | 1.000  | 0.001  | <0.001 | 0.542  | <0.001 |
| Escherichia      | Absent                      | 0.0134<br>[0.0035 - 0.0191] | Absent                      | 0.0112<br>[0.0030 - 0.0398] | <0.001 | <0.001 | 1.000  | 0.001  | <0.001 | 1.000  | <0.001 |
| Facklamia        | Absent                      | 0.0001<br>[0.0001 - 0.0162] | Absent                      | Absent                      | 0.002  | 0.008  | 1.000  | 1.000  | 0.005  | 0.008  | 1.000  |
| Filifactor       | 0.0452<br>[0.0057 - 0.1881] | 0.0023<br>[0.0003 - 0.0092] | 0.0211<br>[0.0104 - 0.1108] | Absent                      | 0.032  | 0.204  | 0.980  | 0.001  | 0.164  | 0.008  | <0.001 |
| Gulbenkiana      | 0.0083<br>[0.0014 - 0.0328] | Absent                      | Absent                      | Absent                      | <0.001 | 0.004  | <0.001 | 0.001  | 1.000  | 1.000  | 1.000  |
| Halanaerobium    | Absent                      | Absent                      | 0.0104                      | Absent                      | <0.001 | 1.000  | <0.001 | 1.000  | <0.001 | 1.000  | <0.001 |

|                   |                             |                             |                             |                             |        |        |        |        |        |        |        |
|-------------------|-----------------------------|-----------------------------|-----------------------------|-----------------------------|--------|--------|--------|--------|--------|--------|--------|
|                   |                             |                             | [0.0053 - 0.0171]           |                             |        |        |        |        |        |        |        |
| Holdemanella      | Absent                      | 0.0002<br>[0.0000 - 0.0050] | Absent                      | Absent                      | 0.021  | 0.025  | 1.000  | 1.000  | 0.018  | 0.025  | 1.000  |
| Janibacter        | Absent                      | 0.0006<br>[0.0001 - 0.0043] | Absent                      | Absent                      | 0.002  | 0.008  | 1.000  | 1.000  | 0.005  | 0.008  | 1.000  |
| Johnsonella       | 0.0029<br>[0.0004 - 0.0126] | Absent                      | Absent                      | Absent                      | <0.001 | 0.004  | <0.001 | 0.001  | 1.000  | 1.000  | 1.000  |
| Klebsiella        | Absent                      | 0.0071<br>[0.0034 - 0.0195] | Absent                      | 0.0028<br>[0.0007 - 0.0390] | <0.001 | <0.001 | 1.000  | <0.001 | <0.001 | 0.763  | <0.001 |
| Kocuria           | 0.0074<br>[0.0046 - 0.0120] | 0.0099<br>[0.0028 - 0.0618] | Absent                      | 0.0037<br>[0.0018 - 0.0065] | 0.003  | 0.993  | <0.001 | 0.304  | <0.001 | 0.486  | <0.001 |
| Lachnoclostridium | Absent                      | 0.0030<br>[0.0000 - 0.0129] | Absent                      | 0.0018<br>[0.0004 - 0.0036] | 0.008  | 0.025  | 1.000  | 0.001  | 0.018  | 0.999  | <0.001 |
| Lactococcus       | 0.0112<br>[0.0088 - 0.0124] | Absent                      | Absent                      | 0.0082<br>[0.0023 - 0.0145] | <0.001 | 0.001  | <0.001 | 0.759  | 1.000  | 0.004  | <0.001 |
| Lawsonella        | Absent                      | 0.0384<br>[0.0120 - 0.2404] | Absent                      | 0.0025<br>[0.0001 - 0.0073] | 0.004  | 0.002  | 1.000  | 0.010  | 0.001  | 0.349  | 0.007  |
| Massilia          | Absent                      | 0.0033<br>[0.0024 - 0.0239] | Absent                      | Absent                      | <0.001 | <0.001 | 1.000  | 1.000  | <0.001 | <0.001 | 1.000  |
| Methylobacterium  | Absent                      | 0.0852<br>[0.0049 - 0.1521] | 0.0005<br>[0.0003 - 0.0011] | Absent                      | 0.001  | 0.002  | 0.003  | 1.000  | 0.114  | 0.002  | 0.003  |
| Microbacterium    | 0.0080<br>[0.0050 - 0.0142] | 0.0516<br>[0.0128 - 0.0709] | Absent                      | Absent                      | <0.001 | 0.379  | <0.001 | <0.001 | <0.001 | <0.001 | 1.000  |
| Micrococcus       | Absent                      | 0.0112<br>[0.0052 - 0.0298] | Absent                      | 0.0044<br>[0.0020 - 0.0084] | <0.001 | <0.001 | 1.000  | 0.001  | <0.001 | 0.542  | <0.001 |
| Mycobacterium     | Absent                      | 0.0072<br>[0.0032 - 0.0256] | Absent                      | Absent                      | <0.001 | <0.001 | 1.000  | 1.000  | <0.001 | <0.001 | 1.000  |
| Negativicoccus    | Absent                      | 0.0037<br>[0.0001 - 0.0119] | Absent                      | Absent                      | 0.002  | 0.008  | 1.000  | 1.000  | 0.005  | 0.008  | 1.000  |
| Nocardioides      | Absent                      | 0.0111<br>[0.0020 - 0.0324] | Absent                      | Absent                      | 0.002  | 0.008  | 1.000  | 1.000  | 0.005  | 0.008  | 1.000  |



|                   |                             |                             |                             |                             |        |        |        |        |        |        |        |
|-------------------|-----------------------------|-----------------------------|-----------------------------|-----------------------------|--------|--------|--------|--------|--------|--------|--------|
| Odoribacter       | Absent                      | 0.0001<br>[0.0000 - 0.0013] | Absent                      | Absent                      | 0.021  | 0.025  | 1.000  | 1.000  | 0.018  | 0.025  | 1.000  |
| Okadaella         | 0.0023<br>[0.0006 - 0.0056] | Absent                      | Absent                      | 0.0003<br>[0.0000 - 0.0016] | 0.009  | 0.004  | <0.001 | 0.379  | 1.000  | 0.054  | 0.019  |
| Olsenella         | Absent                      | 0.0020<br>[0.0000 - 0.0078] | Absent                      | 0.0093<br>[0.0048 - 0.0192] | <0.001 | 0.025  | 1.000  | <0.001 | 0.018  | 0.241  | <0.001 |
| Paenibacillus     | Absent                      | 0.0106<br>[0.0073 - 0.0119] | Absent                      | 0.0077<br>[0.0049 - 0.0126] | <0.001 | <0.001 | 1.000  | <0.001 | <0.001 | 0.998  | <0.001 |
| Pantoea           | Absent                      | 0.0069<br>[0.0046 - 0.0105] | Absent                      | 0.0014<br>[0.0002 - 0.0182] | <0.001 | <0.001 | 1.000  | 0.004  | <0.001 | 0.599  | 0.002  |
| Parabacteroides   | Absent                      | 0.0002<br>[0.0001 - 0.0101] | Absent                      | Absent                      | 0.002  | 0.008  | 1.000  | 1.000  | 0.005  | 0.008  | 1.000  |
| Paracoccus        | Absent                      | 0.0039<br>[0.0002 - 0.0286] | Absent                      | Absent                      | <0.001 | 0.002  | 1.000  | 1.000  | 0.001  | 0.002  | 1.000  |
| Pasteurella       | 0.0020<br>[0.0010 - 0.0109] | Absent                      | 0.0092<br>[0.0025 - 0.0146] | Absent                      | 0.005  | 0.004  | 0.961  | 0.001  | 0.007  | 1.000  | 0.003  |
| Pedobacter        | Absent                      | 0.0072<br>[0.0013 - 0.0188] | Absent                      | Absent                      | <0.001 | <0.001 | 1.000  | 1.000  | <0.001 | <0.001 | 1.000  |
| Pelomonas         | 0.0093<br>[0.0018 - 0.0206] | 0.1057<br>[0.0150 - 0.2862] | Absent                      | Absent                      | <0.001 | 0.379  | <0.001 | 0.001  | <0.001 | <0.001 | 1.000  |
| Ralstonia         | 0.0055<br>[0.0006 - 0.0112] | 0.0309<br>[0.0060 - 0.0958] | Absent                      | Absent                      | <0.001 | 0.811  | <0.001 | <0.001 | 0.001  | 0.002  | 1.000  |
| Rhodococcus       | Absent                      | 0.0250<br>[0.0100 - 0.0635] | Absent                      | 0.0069<br>[0.0053 - 0.0161] | <0.001 | <0.001 | 1.000  | 0.001  | <0.001 | 0.206  | <0.001 |
| Roseburia         | Absent                      | 0.0001<br>[0.0000 - 0.0033] | Absent                      | Absent                      | 0.021  | 0.025  | 1.000  | 1.000  | 0.018  | 0.025  | 1.000  |
| Rubrobacter       | 0.0029<br>[0.0009 - 0.0119] | 0.0187<br>[0.0002 - 0.0309] | Absent                      | Absent                      | <0.001 | 0.998  | <0.001 | <0.001 | 0.001  | 0.002  | 1.000  |
| Ruminiclostridium | Absent                      | 0.0001<br>[0.0000 - 0.0003] | Absent                      | Absent                      | 0.021  | 0.025  | 1.000  | 1.000  | 0.018  | 0.025  | 1.000  |
| Ruminococcus      | Absent                      | 0.0010                      | Absent                      | Absent                      | <0.001 | 0.002  | 1.000  | 1.000  | 0.001  | 0.002  | 1.000  |

|                             |                             |                             |                             |                             |        |        |        |        |        |        |        |
|-----------------------------|-----------------------------|-----------------------------|-----------------------------|-----------------------------|--------|--------|--------|--------|--------|--------|--------|
|                             |                             | [0.0006 - 0.0199]           |                             |                             |        |        |        |        |        |        |        |
| Saccharopolyspora           | Absent                      | 0.0002<br>[0.0001 - 0.0028] | Absent                      | Absent                      | <0.001 | 0.002  | 1.000  | 1.000  | 0.001  | 0.002  | 1.000  |
| Salmonella                  | Absent                      | Absent                      | Absent                      | 0.0013<br>[0.0001 - 0.0106] | 0.007  | 1.000  | 1.000  | 0.010  | 1.000  | 0.024  | 0.007  |
| Scardovia                   | Absent                      | Absent                      | Absent                      | 0.0002<br>[0.0000 - 0.0014] | 0.046  | 1.000  | 1.000  | 0.027  | 1.000  | 0.054  | 0.019  |
| Serratia                    | Absent                      | Absent                      | Absent                      | 0.0016<br>[0.0013 - 0.0088] | <0.001 | 1.000  | 1.000  | <0.001 | 1.000  | 0.001  | <0.001 |
| Snodgrassella               | 0.0028<br>[0.0004 - 0.0135] | 0.0116<br>[0.0000 - 0.1746] | Absent                      | Absent                      | 0.027  | 0.970  | 0.002  | 0.004  | 0.018  | 0.025  | 1.000  |
| Sphingomonas                | Absent                      | 0.1386<br>[0.0050 - 0.2163] | Absent                      | Absent                      | <0.001 | <0.001 | 1.000  | 1.000  | <0.001 | <0.001 | 1.000  |
| Stenotrophomonas            | Absent                      | 0.0021<br>[0.0010 - 0.0211] | Absent                      | 0.0022<br>[0.0012 - 0.0062] | <0.001 | <0.001 | 1.000  | <0.001 | <0.001 | 0.993  | <0.001 |
| Streptobacillus             | Absent                      | Absent                      | 0.0002<br>[0.0000 - 0.0300] | Absent                      | 0.028  | 1.000  | 0.018  | 1.000  | 0.038  | 1.000  | 0.018  |
| Tepidiphilus                | 0.0360<br>[0.0085 - 0.1425] | Absent                      | Absent                      | Absent                      | <0.001 | 0.001  | <0.001 | <0.001 | 1.000  | 1.000  | 1.000  |
| Thermoanaerobacter          | 0.0139<br>[0.0033 - 0.0839] | Absent                      | Absent                      | Absent                      | <0.001 | 0.001  | <0.001 | <0.001 | 1.000  | 1.000  | 1.000  |
| Thermoanaerobacterium       | 0.0161<br>[0.0043 - 0.0532] | Absent                      | Absent                      | Absent                      | <0.001 | 0.001  | <0.001 | <0.001 | 1.000  | 1.000  | 1.000  |
| Thermosinus                 | 0.0177<br>[0.0059 - 0.0932] | Absent                      | Absent                      | Absent                      | <0.001 | 0.001  | <0.001 | <0.001 | 1.000  | 1.000  | 1.000  |
| Tyzzarella                  | Absent                      | 0.0009<br>[0.0000 - 0.0080] | Absent                      | Absent                      | 0.021  | 0.025  | 1.000  | 1.000  | 0.018  | 0.025  | 1.000  |
| unknown Actinomycetales     | Absent                      | 0.0003<br>[0.0001 - 0.0116] | Absent                      | Absent                      | 0.002  | 0.008  | 1.000  | 1.000  | 0.005  | 0.008  | 1.000  |
| unknown Alicyclobacillaceae | 0.0055<br>[0.0011 - 0.0210] | Absent                      | Absent                      | Absent                      | <0.001 | 0.001  | <0.001 | <0.001 | 1.000  | 1.000  | 1.000  |

|                                                        |                             |                             |                             |                             |        |        |        |        |        |        |        |
|--------------------------------------------------------|-----------------------------|-----------------------------|-----------------------------|-----------------------------|--------|--------|--------|--------|--------|--------|--------|
| unknown Alphaproteobacteria                            | Absent                      | 0.0122<br>[0.0081 - 0.0304] | 0.0091<br>[0.0059 - 0.0109] | Absent                      | <0.001 | <0.001 | <0.001 | 1.000  | 0.706  | <0.001 | <0.001 |
| unknown Bacillaceae                                    | 0.0115<br>[0.0093 - 0.0367] | 0.0120<br>[0.0074 - 0.0169] | Absent                      | Absent                      | <0.001 | 0.971  | <0.001 | <0.001 | <0.001 | <0.001 | 1.000  |
| unknown Bifidobacteriaceae                             | 0.0014<br>[0.0008 - 0.0040] | Absent                      | 0.0008<br>[0.0001 - 0.0014] | Absent                      | 0.023  | 0.010  | 0.712  | 0.004  | 0.017  | 1.000  | 0.007  |
| unknown Burkholderiaceae                               | 0.0069<br>[0.0032 - 0.0382] | 0.0070<br>[0.0010 - 0.0415] | Absent                      | Absent                      | <0.001 | 0.855  | <0.001 | <0.001 | <0.001 | <0.001 | 1.000  |
| unknown Burkholderiales                                | 0.0081<br>[0.0048 - 0.0121] | 0.0147<br>[0.0033 - 0.0247] | Absent                      | Absent                      | <0.001 | 0.855  | <0.001 | <0.001 | <0.001 | <0.001 | 1.000  |
| unknown Campylobacterales                              | Absent                      | Absent                      | 0.0138<br>[0.0093 - 0.0237] | 0.0060<br>[0.0020 - 0.0103] | <0.001 | 1.000  | <0.001 | <0.001 | <0.001 | 0.001  | 0.259  |
| unknown Clostridiaceae                                 | 0.0076<br>[0.0068 - 0.0114] | 0.0039<br>[0.0013 - 0.0104] | Absent                      | Absent                      | <0.001 | 0.431  | <0.001 | <0.001 | <0.001 | <0.001 | 1.000  |
| unknown Clostridiales<br>Family XIII Incertae<br>Sedis | Absent                      | Absent                      | 0.0073<br>[0.0046 - 0.0229] | 0.0011<br>[0.0000 - 0.0048] | 0.005  | 1.000  | <0.001 | 0.010  | 0.003  | 0.024  | 0.385  |
| unknown Corynebacteriaceae                             | Absent                      | 0.0074<br>[0.0011 - 0.0134] | Absent                      | 0.0058<br>[0.0010 - 0.0218] | <0.001 | <0.001 | 1.000  | 0.001  | <0.001 | 1.000  | <0.001 |
| unknown Corynebacteriales                              | 0.0129<br>[0.0086 - 0.0216] | 0.0462<br>[0.0205 - 0.1855] | Absent                      | 0.0172<br>[0.0034 - 0.0386] | 0.006  | 0.379  | <0.001 | 1.000  | <0.001 | 0.379  | <0.001 |
| unknown Dermabacteraceae                               | Absent                      | 0.0007<br>[0.0002 - 0.0325] | Absent                      | Absent                      | <0.001 | 0.002  | 1.000  | 1.000  | 0.001  | 0.002  | 1.000  |
| unknown Enterobacteriaceae                             | 0.0053<br>[0.0029 - 0.0130] | 0.0956<br>[0.0152 - 0.3191] | Absent                      | 0.0087<br>[0.0047 - 0.9212] | 0.002  | 0.049  | <0.001 | 0.573  | <0.001 | 0.893  | <0.001 |
| unknown Enterococcaceae                                | Absent                      | Absent                      | 0.0015<br>[0.0008 - 0.0024] | 0.0013<br>[0.0010 - 0.1253] | <0.001 | 1.000  | <0.001 | <0.001 | <0.001 | 0.001  | 0.992  |
| unknown Epsilonproteobacteria                          | Absent                      | Absent                      | 0.0072<br>[0.0045 - 0.0185] | Absent                      | <0.001 | 1.000  | <0.001 | 1.000  | <0.001 | 1.000  | <0.001 |
| unknown Erysipelotrichaceae                            | Absent                      | 0.0014<br>[0.0003 - 0.0033] | Absent                      | Absent                      | 0.002  | 0.008  | 1.000  | 1.000  | 0.005  | 0.008  | 1.000  |

|                               |                             |                             |                             |        |        |        |        |        |        |        |        |
|-------------------------------|-----------------------------|-----------------------------|-----------------------------|--------|--------|--------|--------|--------|--------|--------|--------|
| unknown<br>Erysipelotrichales | Absent                      | 0.0005<br>[0.0002 - 0.0072] | Absent                      | Absent | 0.002  | 0.008  | 1.000  | 1.000  | 0.005  | 0.008  | 1.000  |
| unknown<br>Erysipelotrichia   | Absent                      | 0.0011<br>[0.0000 - 0.0041] | Absent                      | Absent | 0.021  | 0.025  | 1.000  | 1.000  | 0.018  | 0.025  | 1.000  |
| unknown<br>Eubacteriaceae     | Absent                      | 0.0053<br>[0.0005 - 0.0151] | 0.0124<br>[0.0054 - 0.0154] | Absent | <0.001 | 0.002  | <0.001 | 1.000  | 0.862  | 0.002  | <0.001 |
| unknown<br>Flavobacteriaceae  | 0.0084<br>[0.0051 - 0.0198] | 0.0150<br>[0.0029 - 0.0197] | 0.0083<br>[0.0051 - 0.0478] | Absent | 0.025  | 1.000  | 0.961  | <0.001 | 0.880  | 0.002  | <0.001 |
| unknown<br>Fusobacteriaceae   | 0.0062<br>[0.0032 - 0.0136] | 0.0000<br>[0.0000 - 0.0070] | 0.0138<br>[0.0041 - 0.0401] | Absent | 0.042  | 0.198  | 0.921  | <0.001 | 0.234  | 0.170  | <0.001 |
| unknown<br>Fusobacteriales    | 0.0134<br>[0.0071 - 0.0269] | 0.0002<br>[0.0000 - 0.0063] | 0.0150<br>[0.0104 - 0.0279] | Absent | 0.031  | 0.115  | 0.992  | <0.001 | 0.298  | 0.070  | <0.001 |
| unknown<br>Intrasporangiaceae | Absent                      | 0.0005<br>[0.0002 - 0.0063] | Absent                      | Absent | <0.001 | 0.002  | 1.000  | 1.000  | 0.001  | 0.002  | 1.000  |
| unknown<br>Microbacteriaceae  | Absent                      | 0.0096<br>[0.0017 - 0.0188] | Absent                      | Absent | <0.001 | <0.001 | 1.000  | 1.000  | <0.001 | <0.001 | 1.000  |
| unknown<br>Micrococcaceae     | 0.0645<br>[0.0326 - 0.1172] | 0.0295<br>[0.0061 - 0.0574] | 0.0491<br>[0.0192 - 0.1137] | Absent | 0.019  | 0.486  | 0.943  | <0.001 | 0.912  | <0.001 | <0.001 |
| unknown Mollicutes            | 0.0079<br>[0.0016 - 0.0398] | Absent                      | 0.0116<br>[0.0059 - 0.0745] | Absent | <0.001 | 0.001  | 0.494  | <0.001 | <0.001 | 1.000  | <0.001 |
| unknown Moraxellaceae         | Absent                      | Absent                      | 0.0004<br>[0.0002 - 0.0039] | Absent | <0.001 | 1.000  | <0.001 | 1.000  | 0.003  | 1.000  | <0.001 |
| unknown<br>Mycoplasmataceae   | Absent                      | Absent                      | 0.0123<br>[0.0066 - 0.0192] | Absent | <0.001 | 1.000  | <0.001 | 1.000  | <0.001 | 1.000  | <0.001 |
| unknown Neisseriales          | 0.0130<br>[0.0044 - 0.0711] | 0.0048<br>[0.0006 - 0.0160] | 0.0031<br>[0.0005 - 0.0117] | Absent | 0.018  | 0.542  | 0.259  | <0.001 | 1.000  | 0.002  | <0.001 |
| unknown Nocardiaceae          | Absent                      | 0.0008<br>[0.0003 - 0.0032] | Absent                      | Absent | <0.001 | 0.002  | 1.000  | 1.000  | 0.001  | 0.002  | 1.000  |
| unknown<br>Peptoniphilaceae   | Absent                      | 0.0049<br>[0.0017 - 0.0144] | Absent                      | Absent | <0.001 | <0.001 | 1.000  | 1.000  | <0.001 | <0.001 | 1.000  |
| unknown                       | 0.0094                      | Absent                      | 0.0099                      | Absent | <0.001 | 0.001  | 0.992  | <0.001 | 0.003  | 1.000  | <0.001 |

|                                 |                             |                             |                             |                             |        |        |        |        |        |        |        |
|---------------------------------|-----------------------------|-----------------------------|-----------------------------|-----------------------------|--------|--------|--------|--------|--------|--------|--------|
| Porphyromonadaceae              | [0.0034 - 0.0204]           |                             | [0.0089 - 0.0221]           |                             |        |        |        |        |        |        |        |
| unknown<br>Propionibacteriaceae | 0.0028<br>[0.0015 - 0.0093] | 0.1352<br>[0.0262 - 1.7542] | Absent                      | 0.0080<br>[0.0006 - 0.0839] | 0.009  | 0.243  | <0.001 | 0.990  | <0.001 | 0.330  | 0.002  |
| unknown<br>Pseudomonadaceae     | Absent                      | Absent                      | Absent                      | 0.0013<br>[0.0008 - 0.0017] | <0.001 | 1.000  | 1.000  | <0.001 | 1.000  | 0.001  | <0.001 |
| unknown<br>Rhodobacteraceae     | Absent                      | 0.0055<br>[0.0019 - 0.0369] | Absent                      | Absent                      | <0.001 | 0.002  | 1.000  | 1.000  | 0.001  | 0.002  | 1.000  |
| unknown<br>Ruminococcaceae      | Absent                      | 0.0019<br>[0.0008 - 0.0049] | Absent                      | Absent                      | <0.001 | 0.002  | 1.000  | 1.000  | 0.001  | 0.002  | 1.000  |
| unknown<br>Selenomonadaceae     | 0.0051<br>[0.0037 - 0.0191] | Absent                      | Absent                      | Absent                      | <0.001 | 0.001  | <0.001 | <0.001 | 1.000  | 1.000  | 1.000  |
| unknown<br>Sphingomonadaceae    | Absent                      | 0.0106<br>[0.0015 - 0.0311] | Absent                      | Absent                      | <0.001 | 0.002  | 1.000  | 1.000  | 0.001  | 0.002  | 1.000  |
| unknown<br>Sporomusaceae        | 0.0057<br>[0.0012 - 0.0208] | Absent                      | Absent                      | Absent                      | 0.001  | 0.010  | 0.002  | 0.004  | 1.000  | 1.000  | 1.000  |
| unknown<br>Staphylococcaceae    | Absent                      | 0.0053<br>[0.0032 - 0.0131] | 0.0044<br>[0.0031 - 0.0053] | 0.0069<br>[0.0013 - 0.0508] | 0.015  | <0.001 | <0.001 | <0.001 | 0.912  | 1.000  | 0.999  |
| unknown Tenericutes             | Absent                      | Absent                      | 0.0070<br>[0.0047 - 0.0234] | Absent                      | <0.001 | 1.000  | <0.001 | 1.000  | <0.001 | 1.000  | <0.001 |
| unknown Tissierellia            | 0.0047<br>[0.0012 - 0.0274] | 0.0028<br>[0.0011 - 0.0053] | 0.0033<br>[0.0012 - 0.0280] | Absent                      | 0.016  | 0.990  | 1.000  | <0.001 | 1.000  | <0.001 | <0.001 |
| unknown<br>Xanthomonadaceae     | Absent                      | 0.0019<br>[0.0005 - 0.0193] | Absent                      | 0.0011<br>[0.0003 - 0.0022] | <0.001 | <0.001 | 1.000  | 0.001  | <0.001 | 0.763  | <0.001 |
| Variovorax                      | 0.0030<br>[0.0016 - 0.0085] | Absent                      | Absent                      | Absent                      | <0.001 | 0.001  | <0.001 | <0.001 | 1.000  | 1.000  | 1.000  |
| Xanthomonas                     | Absent                      | 0.0020<br>[0.0005 - 0.0103] | Absent                      | Absent                      | <0.001 | 0.002  | 1.000  | 1.000  | 0.001  | 0.002  | 1.000  |

Median relative abundance (%) along with interquartile range [first-third quartiles]; Absent: all values are 0%

\*p-values from Kruskal-Wallis test and were adjusted following the Bonferroni correction for multiple testing

#p-values from Dwass-Steel-Critchlow-Fligner test
